# Supplementary material
Source: publisher figshare collection journal article supplement (https://frontiersin.figshare.com/ndownloader/files/13001294)
Supplement: Supplementary file [file 13001294]

**Table S1.** Comparison of one-dimensional data obtained from serial ultrathin sectioning and cryoTEM of MSG and MTB.

|                                     |                             |         | Number of cell<br>examined | Diameter (μm)           |                      | Length (μm)       | Aspect ratio         |
|-------------------------------------|-----------------------------|---------|----------------------------|-------------------------|----------------------|-------------------|----------------------|
|                                     |                             |         |                            | OM                      | PM                   |                   |                      |
| <i>M. smegmatis</i>                 | Serial ultrathin<br>section | Average | 7                          | 0.58 <sup>a, c, h</sup> | 0.55 <sup>a, d</sup> | 3.54              | 6.27 <sup>f</sup>    |
|                                     |                             | SD      |                            | 0.05                    | 0.05                 | 1.83              | 3.71                 |
|                                     |                             | Min     |                            | 0.51                    | 0.49                 | 2.07              | 3.35                 |
|                                     |                             | Max     |                            | 0.66                    | 0.63                 | 7.41              | 14.35                |
|                                     | CryoTEM                     | Average | 61                         | 0.77 <sup>b, h</sup>    | ND                   | 3.46 <sup>e</sup> | 4.44                 |
|                                     |                             | SD      |                            | 0.08                    | ND                   | 1.40              | 1.69                 |
|                                     |                             | Min     |                            | 0.66                    | ND                   | 1.08              | 1.34                 |
|                                     |                             | Max     |                            | 1.00                    | ND                   | 6.27              | 7.65                 |
| <i>M. tuberculosis</i> <sup>1</sup> | Serial ultrathin<br>section | Average | 5                          | 0.34 <sup>a, j</sup>    | 0.30 <sup>a</sup>    | 2.70              | 8.24 <sup>g</sup>    |
|                                     |                             | SD      |                            | 0.03                    | 0.02                 | 1.07              | 3.61                 |
|                                     |                             | Min     |                            | 0.29                    | 0.27                 | 1.30              | 3.61                 |
|                                     |                             | Max     |                            | 0.37                    | 0.33                 | 3.80              | 13.00                |
|                                     | CryoTEM                     | Average | 14                         | 0.60 <sup>b, j</sup>    | ND                   | 2.65 <sup>e</sup> | 4.38                 |
|                                     |                             | SD      |                            | 0.06                    | ND                   | 0.74              | 1.16                 |
|                                     |                             | Min     |                            | 0.51                    | ND                   | 1.43              | 2.60                 |
|                                     |                             | Max     |                            | 0.73                    | ND                   | 3.85              | 6.68                 |
| <i>E. coli</i> <sup>2</sup>         | Serial ultrathin<br>section | Average | 9                          | 0.89 <sup>c</sup>       | 0.85 <sup>d</sup>    | 2.47              | 2.84 <sup>f, g</sup> |
|                                     |                             | SD      |                            | 0.06                    | 0.06                 | 0.37              | 0.46                 |
|                                     |                             | Min     |                            | 0.67                    | 0.77                 | 2.05              | 2.18                 |
|                                     |                             | Max     |                            | 0.80                    | 0.92                 | 3.04              | 3.46                 |

ND: not determined.

a: p &lt; 0.0001, b: p &lt; 0.0001, c: p &lt; 0.0001, d: p &lt; 0.0001, e: p &lt; 0.05, f: p &lt; 0.02, g: p &lt; 0.001, h: p &lt; 0.000001, j: p &lt; 0.000001.

1: Yamada et al., 2015

2: Yamada et al., 2017
